# Supplementary material
Source: publisher site journal article supplement (https://www.kjim.org/upload/media/kjim-2019-425-suppl1.pdf)
Supplement: Supplementary file 1 [file kjim-2019-425-suppl1.pdf]

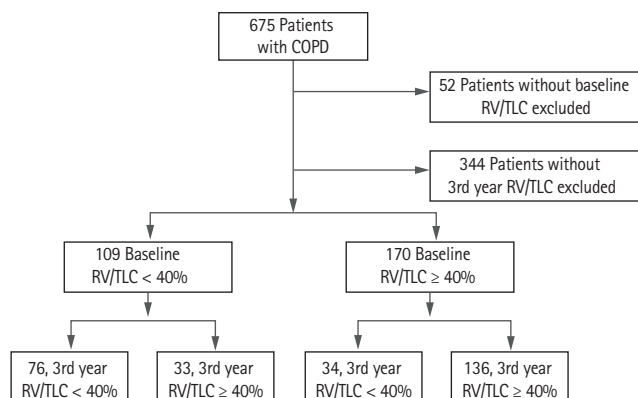

**Supplementary Figure 1.** CONSORT flow diagram. Flow of patients included in the analysis in this study. COPD, chronic obstructive pulmonary disease; RV/TLC, residual volume to total lung capacity ratio.
